# Supplementary material for: In Vitro Characterisation of Potential Probiotic Bacteria Isolated from a Naturally Fermented Carrot and Ginger Brine
Source: MDPI journal article supplement (doi:10.3390/fermentation8100534), 2022-10-12
Supplement: s1 [file s1]

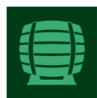

## Article

# *In Vitro* Characterisation of Potential Probiotic Bacteria Isolated from a Naturally Fermented Carrot and Ginger Brine

Nontobeko Cele, Babalwa Nyide and Thandeka Khoza \*

## Supplementary material

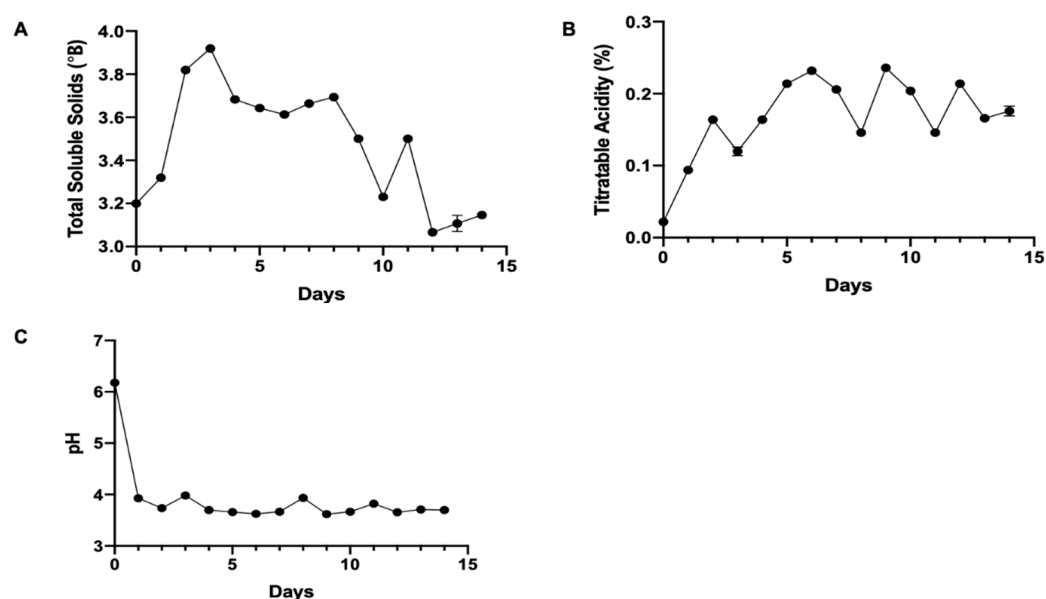

**Figure S1.** Effect of fermentation duration on pH, titratable acidity, and total soluble solids of fermented carrot and ginger brine. (A) Total soluble solids (TSS), (B) Titratable acidity expressed as lactic acid, and (C) pH. The TSS, pH, and titratable acidity of the brine were measured every day of the fermentation process. Error bars represent the standard deviation (n = 3).

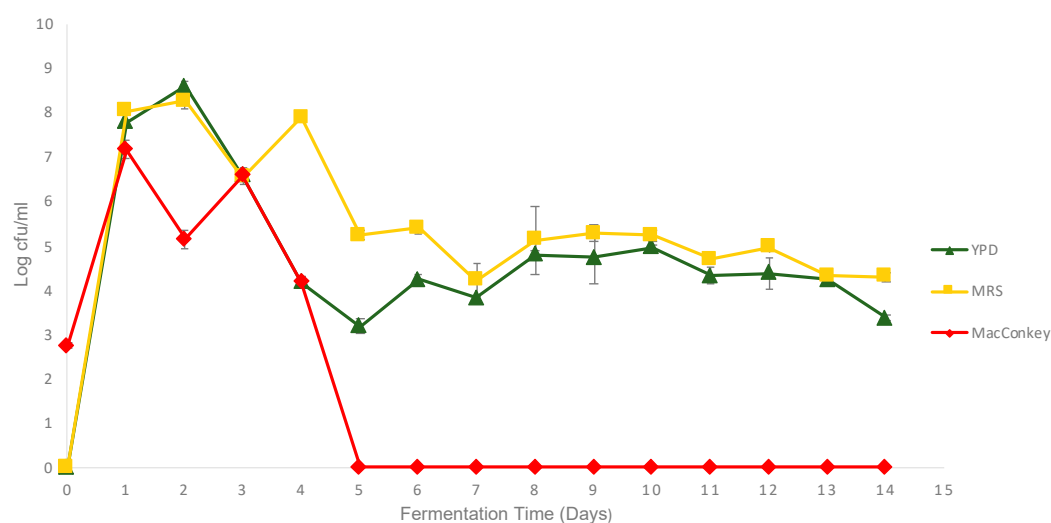

**Figure S2.** Microbial community dynamics of spontaneously fermented carrot and ginger brine. Plating was performed on MRS, YPD, and MacConkey agar for the enumeration of LAB, yeast, and coliforms, respectively. Error bars represent the standard deviation (n = 3).

**Table S1.** Morphological and physiological characterisation of isolates from a fermented carrot and ginger brine.

| Isolate | Cell Shape | Gram Stain-<br>ing | CO <sub>2</sub> Produc-<br>tion | Catalase<br>Reaction | Growth at Different<br>Temperatures |       |
|---------|------------|--------------------|---------------------------------|----------------------|-------------------------------------|-------|
|         |            |                    |                                 |                      | 10 °C                               | 45 °C |
| L1      | Spherical  | +                  | +                               | -                    | -                                   | -     |
| L2      | Spherical  | +                  | +                               | -                    | -                                   | -     |
| L3      | Spherical  | +                  | +                               | -                    | -                                   | -     |
| L4      | Spherical  | +                  | +                               | -                    | -                                   | -     |
| L5      | Spherical  | +                  | +                               | -                    | -                                   | -     |
| L6      | Spherical  | +                  | +                               | -                    | -                                   | -     |
| L7      | Spherical  | +                  | +                               | -                    | -                                   | -     |
| L8      | Spherical  | +                  | +                               | -                    | -                                   | -     |
| L9      | Spherical  | +                  | +                               | -                    | -                                   | -     |
| L10     | Spherical  | +                  | +                               | -                    | -                                   | -     |
| L11     | Spherical  | +                  | +                               | -                    | -                                   | -     |
| L12     | Spherical  | +                  | +                               | -                    | -                                   | -     |
| L13     | Spherical  | +                  | +                               | -                    | -                                   | -     |
| L14     | Spherical  | +                  | +                               | -                    | -                                   | -     |
| L15     | Spherical  | +                  | +                               | -                    | -                                   | -     |
| L16     | Spherical  | +                  | +                               | -                    | -                                   | -     |
| L17     | Rod        | +                  | +                               | -                    | -                                   | -     |
| L18     | Rod        | +                  | +                               | -                    | -                                   | -     |

+ = positive reaction    - = negative reaction.

**Table S2.** Carbohydrate fermentation profile of lactic acid bacteria isolated from fermented carrot and ginger brine.

[illegible]

[illegible]

|                           |      |      |      |      |      |      |      |      |      |      |      |      |      |      |      |      |   |   |   |
|---------------------------|------|------|------|------|------|------|------|------|------|------|------|------|------|------|------|------|---|---|---|
|                           |      |      |      |      |      |      |      |      |      |      |      |      |      |      |      |      |   |   |   |
| Starch                    | -    | -    | -    | -    | -    | -    | -    | -    | -    | -    | -    | -    | -    | -    | -    | -    | - | - | + |
| Glycogen                  | -    | -    | -    | -    | -    | -    | -    | -    | -    | -    | -    | -    | -    | -    | -    | -    | - | - | + |
| Xylitol                   | -    | -    | -    | -    | -    | -    | -    | -    | -    | -    | -    | -    | -    | -    | -    | -    | - | - | - |
| Gentiobiose               | +    | +    | +    | +    | +    | +    | +    | +    | +    | +    | +    | +    | +    | +    | +    | +    | + | - | - |
| D-Turanose                | +    | +    | +    | +    | +    | +    | +    | +    | +    | +    | +    | +    | +    | +    | +    | +    | + | - | + |
| D-Lyxose                  | -    | -    | -    | -    | -    | -    | -    | -    | -    | -    | -    | -    | -    | -    | -    | -    | - | - | - |
| D-Tagatose                | -    | -    | -    | -    | -    | -    | -    | -    | -    | -    | -    | -    | -    | -    | -    | -    | - | + | + |
| D-Fucose                  | -    | -    | -    | -    | -    | -    | -    | -    | -    | -    | -    | -    | -    | -    | -    | -    | - | - | - |
| L-Fucose                  | -    | -    | -    | -    | -    | -    | -    | -    | -    | -    | -    | -    | -    | -    | -    | -    | - | - | - |
| D-Arabitol                | -    | -    | -    | -    | -    | -    | -    | -    | -    | -    | -    | -    | -    | -    | -    | -    | - | - | - |
| L-Arabitol                | -    | -    | -    | -    | -    | -    | -    | -    | -    | -    | -    | -    | -    | -    | -    | -    | - | - | - |
| Potassium Gluconate       | +    | +    | +    | +    | +    | +    | +    | +    | +    | +    | +    | +    | +    | +    | +    | +    | + | - | - |
| Potassium 2-Ketogluconate | -    | -    | -    | -    | -    | -    | -    | -    | -    | -    | -    | -    | -    | -    | -    | -    | - | - | - |
| Potassium 5-Ketogluconate | -    | -    | -    | -    | -    | -    | -    | -    | -    | -    | -    | -    | -    | -    | -    | -    | - | - | - |
| Identification %          | 95.6 | 95.6 | 98.5 | 98.5 | 98.5 | 99.6 | 99.8 | 99.8 | 95.6 | 99.6 | 99.8 | 98.5 | 98.5 | 95.6 | 95.6 | 95.6 | - | - | - |

Isolates L1–L16 = *Leuconostoc mesenteroides* subsp. *Mesenteroides*; isolate L17 = *Bacillus pumilus*; isolate L18 = *Bacillus licheniformis*.
